# Supplementary material for: An antioxidant screen identifies ascorbic acid for prevention of light-induced mitotic prolongation in live cell imaging
Source: PubMed Central journal article supplement (PMC10620154; doi:10.1038/s42003-023-05479-6), 2023-11-01
Supplement: 42003_2023_5479_MOESM3_ESM.pdf [file 42003_2023_5479_MOESM3_ESM.pdf]

## Description of Additional Supplementary Files

**File name:** Supplementary Data 1

**Description:** The source data behind the graphs in the paper.

**File name:** Supplementary Movie 1

**Description:** Mitotic progression of RPE1 cells in the low- and high-light illumination.

Time-lapse imaging of mitotic RPE1 cells expressing H2B-mNG and TUBG1-mRuby2 in the low and high conditions (3-min intervals). T=0 is assigned as NEBD. The movie corresponds to Fig. 1b.

**File name:** Supplementary Movie 2

**Description:** Mitotic progression under the cell-cycle synchronization.

Time-lapse imaging of mitotic RPE1 cells expressing H2B-mNG and TUBG1-mRuby2 synchronized with 300 nM palbociclib or with serum starvation plus 1  $\mu$ M aphidicolin under the high illumination conditions (3-min intervals). T=0 is assigned as NEBD. The movie corresponds to Fig. 2a, f.

**File name:** Supplementary Movie 3

**Description:** Effect of antioxidants against light-induced mitotic abnormalities.

Time-lapse imaging of mitotic RPE1 cells expressing H2B-mNG and TUBG1-mRuby2 in the presence of antioxidants (3-min intervals). T=0 is assigned as NEBD. The movie corresponds to Fig. 3a.

**File name:** Supplementary Movie 4

**Description:** Mitotic progression in the short-interval live imaging.

Time-lapse imaging of mitotic RPE1 cells expressing H2B-mNG and TUBG1-mRuby2 in the control condition (3-min intervals, left) and short-interval condition (30-sec intervals, center and right). T=0 is assigned as NEBD. The movie corresponds to Fig. 5b.
